# Supplementary material for: Engineering brain activity patterns by neuromodulator polytherapy for treatment of disorders
Source: PubMed Central journal article supplement (PMC6565674; doi:10.1038/s41467-019-10541-1), 2019-06-13
Supplement: 41467_2019_10541_MOESM4_ESM.pdf [file 41467_2019_10541_MOESM4_ESM.pdf]

## Description of Additional Supplementary Files

File Name: Supplementary Movie 1

Description: **Light-triggered seizure-like locomotor activity in scn1lab mutant larvae.** Videos show light-triggered locomotor activity in scn1labs552 homozygous mutants and in 96-well plates. Locomotor activity was recorded in darkness using infrared illumination and an automated tracking platform. Light stimuli consist of two brief (500 ms) light pulses separated by a 1 second interval. In each video, eleven wells contain individual zebrafish larvae while the dark well located in the bottom right position contains a fluorescent dye that is sensitive to illumination in the visible spectrum and serves to indicate the timing of the light stimuli.

File Name: Supplementary Movie 2

Description: **Light-triggered seizure-like locomotor activity in sibling control larvae.** Videos show light-triggered locomotor activity in age-matched sibling controls in 96-well plates. Locomotor activity was recorded in darkness using infrared illumination and an automated tracking platform. Light stimuli consist of two brief (500 ms) light pulses separated by a 1 second interval. In each video, eleven wells contain individual zebrafish larvae while the dark well located in the bottom right position contains a fluorescent dye that is sensitive to illumination in the visible spectrum and serves to indicate the timing of the light stimuli.

File Name: Supplementary Movie 3

Description: **Light-triggered seizure-like GCaMP activity in scn1lab mutant larvae, example 1.** Videos show light-triggered GCaMP activity from a single z-plane in scn1labs552 homozygous mutants. GCaMP activity was imaged as described using our high-throughput light sheet platform. Light stimuli consist of two brief (500 ms) light pulses separated by a 1 second interval. The beginning of each video corresponds to the presentation of the light stimulus.

File Name: Supplementary Movie 4

Description: **Light-triggered seizure-like GCaMP activity in scn1lab mutant larvae, example 2.** Videos show light-triggered GCaMP activity from a single z-plane in scn1labs552 homozygous mutants. GCaMP activity was imaged as described using our high-throughput light sheet platform. Light stimuli consist of two brief (500 ms) light pulses separated by a 1 second interval. The beginning of each video corresponds to the presentation of the light stimulus.

File Name: Supplementary Movie 5

Description: **Light-triggered seizure-like GCaMP activity in sibling control larvae, example 1.** Videos show light-triggered GCaMP activity from a single z-plane in age-matched sibling controls. GCaMP activity was imaged as described using our high-throughput light sheet platform. Light stimuli consist of two brief (500 ms) light pulses separated by a 1 second interval. The beginning of each video corresponds to the presentation of the light stimulus.

File Name: Supplementary Movie 6

Description: **Light-triggered seizure-like GCaMP activity in sibling control larvae, example 2.** Videos show light-triggered GCaMP activity from a single z-plane in age-matched sibling controls. GCaMP activity was imaged as described using our high-throughput light sheet platform. Light stimuli consist of two brief (500 ms) light pulses separated by a 1 second interval. The beginning of each video corresponds to the presentation of the light stimulus.

File Name: Supplementary Movie 7

Description: **Spontaneous locomotor activity in scn1lab mutant larvae after optimal polytherapy.**  
The mutants are treated simultaneously with fluoxetine and mifepristone using one of the optimal polytherapy dose regimens (both drugs at 30% of dosage).
